# Supplementary material for: Is coconut coir dust an efficient biofertilizer carrier for promoting coffee seedling growth and nutrient uptake?
Source: PeerJ. 2023 Jun 14;11:e15530. doi: 10.7717/peerj.15530 (PMC10276558; doi:10.7717/peerj.15530)
Supplement: Data S1 [file peerj-11-15530-s001.xlsx]

## Sheet: Table 2
Data used for Two‐way analysis of variance of the bacterial population, pH and EC as affected by carrier and time after inoculation
Carirrer	Time	EC	pH	population	Isolate		Note: S,S2-4a1; R, R2-3b1
Coconut coir	7	4.79	6.96	150000000	S
Coconut coir	7	4.63	6.95	130000000	S
Coconut coir	7	4.59	7.06	160000000	S
Coconut coir	15	4.17	6.47	165000000	S
Coconut coir	15	4.23	6.47	190000000	S
Coconut coir	15	4.95	6.46	180000000	S
Coconut coir	30	4.2	6.61	255000000	S
Coconut coir	30	4.29	6.57	345000000	S
Coconut coir	30	4.19	6.57	280000000	S
Coconut coir	45	4.29	6.34	15000000	S
Coconut coir	45	4.21	6.06	125000000	S
Coconut coir	45	4.23	6.42	130000000	S
Coconut coir	60	4.18	6.23	110000000	S
Coconut coir	60	4.16	6.17	90000000	S
Coconut coir	60	4.18	6.35	195000000	S
Diatomite	7	0.924	7.53	115000000	S
Diatomite	7	0.933	7.82	105000000	S
Diatomite	7	0.996	7.1	90000000	S
Diatomite	15	0.931	7.51	180000000	S
Diatomite	15	0.877	7.69	175000000	S
Diatomite	15	0.948	7.55	165000000	S
Diatomite	30	1.005	7.34	155000000	S
Diatomite	30	0.972	7.87	175000000	S
Diatomite	30	0.788	7.75	160000000	S
Diatomite	45	0.956	7.94	165000000	S
Diatomite	45	1.002	7.76	140000000	S
Diatomite	45	1.058	7.76	135000000	S
Diatomite	60	1.021	7.05	80000000	S
Diatomite	60	1.156	7.54	210000000	S
Diatomite	60	1.17	7.19	80000000	S
Vermiculite	7	1.559	8.36	70000000	S
Vermiculite	7	1.582	8.38	80000000	S
Vermiculite	7	1.569	8.33	70000000	S
Vermiculite	15	1.575	8.3	155000000	S
Vermiculite	15	1.538	8.36	165000000	S
Vermiculite	15	1.471	8.334	160000000	S
Vermiculite	30	1.625	8.28	475000000	S
Vermiculite	30	1.562	8.17	330000000	S
Vermiculite	30	1.518	8.18	420000000	S
Vermiculite	45	1.704	8.76	255000000	S
Vermiculite	45	1.611	7.83	185000000	S
Vermiculite	45	1.641	7.9	120000000	S
Vermiculite	60	1.626	8.1	115000000	S
Vermiculite	60	1.624	8.18	195000000	S
Vermiculite	60	1.651	8.12	290000000	S
Perlite	7	0.1733	8.83	75000000	S
Perlite	7	1.688	8.65	85000000	S
Perlite	7	1.663	8.19	105000000	S
Perlite	15	1.798	8.79	3.4	S
Perlite	15	1.775	8.86	165000000	S
Perlite	15	1.732	8.76	150000000	S
Perlite	30	1.735	8.5	400000000	S
Perlite	30	1.755	8.77	215000000	S
Perlite	30	1.768	8.72	335000000	S
Perlite	45	1.901	8.58	160000000	S
Perlite	45	1.887	8.46	220000000	S
Perlite	45	1.912	8.24	135000000	S
Perlite	60	1.861	8.83	250000000	S
Perlite	60	1.841	8.89	230000000	S
Perlite	60	1.762	8.86	165000000	S
Coconut coir	7	4.56	6.8	105000000	R
Coconut coir	7	4.56	6.96	95000000	R
Coconut coir	7	4.83	6.94	90000000	R
Coconut coir	15	4.54	6.56	115000000	R
Coconut coir	15	4.51	6.46	120000000	R
Coconut coir	15	4.51	6.46	105000000	R
Coconut coir	30	4.23	6.55	235000000	R
Coconut coir	30	4.32	6.43	175000000	R
Coconut coir	30	4.27	6.38	445000000	R
Coconut coir	45	4.19	6.15	220000000	R
Coconut coir	45	4.15	6.36	375000000	R
Coconut coir	45	4.18	6.47	35000000	R
Coconut coir	60	4.15	6.31	190000000	R
Coconut coir	60	4.11	6.24	90000000	R
Coconut coir	60	4.11	6.33	365000000	R
Diatomite	7	0.95	7.3	60000000	R
Diatomite	7	0.925	7.62	50000000	R
Diatomite	7	0.93	7.49	11	R
Diatomite	15	0.595	7.33	50000000	R
Diatomite	15	0.974	7.44	60000000	R
Diatomite	15	0.984	7.54	45000000	R
Diatomite	30	0.885	7.48	240000000	R
Diatomite	30	0.867	7.42	195000000	R
Diatomite	30	0.78	7.73	400000000	R
Diatomite	45	0.869	7.85	115000000	R
Diatomite	45	1.01	7.67	120000000	R
Diatomite	45	0.841	7.39	75000000	R
Diatomite	60	1.117	7.54	270000000	R
Diatomite	60	0.986	7.55	195000000	R
Diatomite	60	1.088	7.24	215000000	R
Vermiculite	7	1.562	8.52	15000000	R
Vermiculite	7	1.544	8.5	35000000	R
Vermiculite	7	1.465	8.51	50000000	R
Vermiculite	15	1.507	8.53	130000000	R
Vermiculite	15	1.527	8.48	85000000	R
Vermiculite	15	1.244	8.42	100000000	R
Vermiculite	30	1.501	8.2	250000000	R
Vermiculite	30	1.078	8.22	155000000	R
Vermiculite	30	1.494	8.23	200000000	R
Vermiculite	45	1.602	8.55	260000000	R
Vermiculite	45	1.588	8.01	155000000	R
Vermiculite	45	1.517	8.06	55000000	R
Vermiculite	60	1.576	8.2	445000000	R
Vermiculite	60	1.521	8.22	115000000	R
Vermiculite	60	1.589	8.21	140000000	R
Perlite	7	1.842	8.84	50000000	R
Perlite	7	1.803	8.66	30000000	R
Perlite	7	1.8692	8.07	35000000	R
Perlite	15	1.7773	8.16	110000000	R
Perlite	15	1.8731	8.05	115000000	R
Perlite	15	1.777	8.97	110000000	R
Perlite	30	1.7274	7.74	65000000	R
Perlite	30	1.7568	7.92	70000000	R
Perlite	30	1.7661	7.86	30000000	R
Perlite	45	1.804	7.74	90000000	R
Perlite	45	1.617	8.53	155000000	R
Perlite	45	1.725	8.27	55000000	R
Perlite	60	1.7707	7.8	45000000	R
Perlite	60	1.787	8.96	100000000	R
Perlite	60	1.7013	7.78	21	R

## Sheet: Fig. 1
				Bacterial population of S3-4a1								Bacterial population of R2-3b1
			Days after incubation								Days after incubation
	Treatments	Rep.	7	15	30	45	60		Treatments	Rep.	7	15	30	45	60
			10-8 CFU g-1 dry soil								10-8 CFU g-1 dry soil
	Perlite	1	0.75	3.4e-08	4	1.6	2.5		Perlite	1	0.5	1.1	0.65	0.9	0.45
	Perlite	2	0.85	1.65	2.15	2.2	2.3		Perlite	2	0.3	1.15	0.7	1.55	1
	Perlite	3	1.05	1.5	3.35	1.35	1.65		Perlite	3	0.35	1.1	0.3	0.55	2.1e-07
	Vermiculite	1	0.7	1.55	4.75	2.55	1.15		Vermiculite	1	0.15	1.3	2.5	2.6	4.45
	Vermiculite	2	0.8	1.65	3.3	1.85	1.95		Vermiculite	2	0.35	0.85	1.55	1.55	1.15
	Vermiculite	3	0.7	1.6	4.2	1.2	2.9		Vermiculite	3	0.5	1	2	0.55	1.4
	Diatomite	1	1.15	1.8	1.55	1.65	0.8		Diatomite	1	0.6	0.5	2.4	1.15	2.7
	Diatomite	2	1.05	1.75	1.75	1.4	2.1		Diatomite	2	0.5	0.6	1.95	1.2	1.95
	Diatomite	3	0.9	1.65	1.6	1.35	0.8		Diatomite	3	1.1e-07	0.45	4	0.75	2.15
	Coconut coir	1	1.5	1.65	2.55	0.15	1.1		Coconut coir	1	1.05	1.15	2.35	2.2	1.9
	Coconut coir	2	1.3	1.9	3.45	1.25	0.9		Coconut coir	2	0.95	1.2	1.75	3.75	0.9
	Coconut coir	3	1.6	1.8	2.8	1.3	1.95		Coconut coir	3	0.9	1.05	4.45	0.35	3.65

## Sheet: Fig. 2
	pH in the different carrier materials inoculated with S2-4a1 and R2-3b1
					S3-4a1								R2-3b1
	Treatments	Rep.	Days after incubation						Treatments	Rep.	Days after incubation
			7	15	30	45	60				7	15	30	45	60
	Perlite	1	8.03	8.79	8.5	8.58	8.83		Perlite	1	8.84	8.16	7.74	7.74	7.8
	Perlite	2	8.25	8.86	8.77	8.16	8.89		Perlite	2	8.66	8.05	7.92	8.53	8.96
	Perlite	3	8.19	8.76	8.72	8.24	8.86		Perlite	3	8.07	8.97	7.86	8.27	7.78
	Vermiculite	1	8.36	8.3	8.28	7.76	8.1		Vermiculite	1	8.52	8.53	8.2	8.55	8.2
	Vermiculite	2	8.38	8.36	8.17	7.83	8.18		Vermiculite	2	8.5	8.48	8.22	8.01	8.22
	Vermiculite	3	8.33	8.334	8.18	7.9	8.12		Vermiculite	3	8.51	8.42	8.23	8.06	8.21
	Diatomite	1	7.53	7.51	7.34	7.94	7.05		Diatomite	1	7.3	7.33	7.98	7.85	7.54
	Diatomite	2	6.82	7.69	7.87	7.76	5.54		Diatomite	2	7.62	7.44	7.92	7.67	7.55
	Diatomite	3	7.1	7.55	7.75	7.76	7.19		Diatomite	3	7.49	7.54	7.73	7.39	7.24
	Coconut coir	1	6.96	6.47	6.61	6.34	6.23		Coconut coir	1	6.8	6.56	6.55	6.15	6.31
	Coconut coir	2	6.95	6.47	6.57	6.06	6.17		Coconut coir	2	6.96	6.46	6.43	6.36	6.24
	Coconut coir	3	7.06	6.46	6.57	6.42	6.35		Coconut coir	3	6.94	6.46	6.38	6.47	6.33

## Sheet: Fig. 3
	EC in the different carrier materials inoculated with S2-4a1 and R2-3b1
					S3-4a1								R2-3b1
	Treatments	Rep.	Days after incubation						Treatments	Rep.	Days after incubation
			7	15	30	45	60				7	15	30	45	60
			mS/cm								mS/cm
	Perlite	1	0.1733	1.798	1.735	1.901	1.861		Perlite	1	1.842	1.7773	1.7274	1.804	1.7707
	Perlite	2	1.688	1.775	1.755	1.887	1.841		Perlite	2	1.803	1.8731	1.7568	1.617	1.787
	Perlite	3	1.663	1.732	1.768	1.912	1.762		Perlite	3	1.8692	1.777	1.7661	1.725	1.7013
	Vermiculite	1	1.559	1.575	1.625	1.704	1.626		Vermiculite	1	1.562	1.507	1.501	1.602	1.576
	Vermiculite	2	1.582	1.538	1.562	1.611	1.624		Vermiculite	2	1.544	1.527	1.078	1.588	1.521
	Vermiculite	3	1.569	1.471	1.518	1.641	1.651		Vermiculite	3	1.465	1.244	1.494	1.517	1.589
	Diatomite	1	0.924	0.931	1.005	0.956	1.021		Diatomite	1	0.95	0.595	0.885	0.869	1.117
	Diatomite	2	0.933	0.877	0.972	1.002	1.156		Diatomite	2	0.925	0.974	0.867	1.01	0.986
	Diatomite	3	0.996	0.948	0.788	1.058	1.17		Diatomite	3	0.93	0.984	0.78	0.841	1.088
	Coconut coir	1	4.79	4.17	4.2	4.29	4.18		Coconut coir	1	4.56	4.54	4.23	4.19	4.15
	Coconut coir	2	4.63	4.23	4.29	4.21	4.16		Coconut coir	2	4.56	4.51	4.32	4.15	4.11
	Coconut coir	3	4.59	4.95	4.19	4.23	4.18		Coconut coir	3	4.83	4.51	4.27	4.18	4.11

## Sheet: Fig. 4
				S3-4a1				R2-3b1
				EC	pH	population		EC	pH	population
			Coconut coir	4.2	6.61	255000000		4.23	6.55	235000000
			Coconut coir	4.29	6.57	345000000		4.32	6.43	175000000
			Coconut coir	4.19	6.57	280000000		4.27	6.38	445000000
			Coconut coir	4.29	6.34	15000000		4.19	6.15	220000000
			Coconut coir	4.21	6.06	125000000		4.15	6.36	375000000
			Coconut coir	4.23	6.42	130000000		4.18	6.47	35000000
			Coconut coir	4.18	6.23	110000000		4.15	6.31	190000000
			Coconut coir	4.16	6.17	90000000		4.11	6.24	90000000
			Coconut coir	4.18	6.35	195000000		4.11	6.33	365000000
			Diatomite	1.005	7.34	155000000		0.885	7.48	240000000
			Diatomite	0.972	7.87	175000000		0.867	7.42	195000000
			Diatomite	0.788	7.75	160000000		0.78	7.73	400000000
			Diatomite	0.956	7.94	165000000		0.869	7.85	115000000
			Diatomite	1.002	7.76	140000000		1.01	7.67	120000000
			Diatomite	1.058	7.76	135000000		0.841	7.39	75000000
			Diatomite	1.021	7.05	80000000		1.117	7.54	270000000
			Diatomite	1.156	7.54	210000000		0.986	7.55	195000000
			Diatomite	1.17	7.19	80000000		1.088	7.24	215000000
			Vermiculite	1.625	8.28	475000000		1.501	8.2	250000000
			Vermiculite	1.562	8.17	330000000		1.078	8.22	155000000
			Vermiculite	1.518	8.18	420000000		1.494	8.23	200000000
			Vermiculite	1.704	8.76	255000000		1.602	8.55	260000000
			Vermiculite	1.611	7.83	185000000		1.588	8.01	155000000
			Vermiculite	1.641	7.9	120000000		1.517	8.06	55000000
			Vermiculite	1.626	8.1	115000000		1.576	8.2	445000000
			Vermiculite	1.624	8.18	195000000		1.521	8.22	115000000
			Vermiculite	1.651	8.12	290000000		1.589	8.21	140000000
			Perlite	1.735	8.5	400000000		1.7274	7.74	65000000
			Perlite	1.755	8.77	215000000		1.7568	7.92	70000000
			Perlite	1.768	8.72	335000000		1.7661	7.86	30000000
			Perlite	1.901	8.58	160000000		1.804	7.74	90000000
			Perlite	1.887	8.46	220000000		1.617	8.53	155000000
			Perlite	1.912	8.24	135000000		1.725	8.27	55000000
			Perlite	1.861	8.83	250000000		1.7707	7.8	45000000
			Perlite	1.841	8.89	230000000		1.787	8.96	100000000
			Perlite	1.762	8.86	165000000		1.7013	7.78	21

## Sheet: Fig 5 and Fig. 6
				Nutrient uptake in coffee plant at 90 days after inoculation
	Treatments	Rep.	Biomass	N uptake	P uptake	K uptake	Ca uptake	Mg uptake
			g	g/plant
	Control	1	30.15	0.91053	0.07236	0.91656	0.304515	0.13266
	Control	2	29.54	0.892108	0.070896	0.898016	0.298354	0.129976
	Control	3	29.56	0.892712	0.070944	0.898624	0.298556	0.130064
	S2-4a1	1	38.25	1.29668	0.103275	1.2393	0.52785	0.1989
	S2-4a1	2	40.63	1.37736	0.109701	1.31641	0.560694	0.211276
	S2-4a1	3	38.98	1.32142	0.105246	1.26295	0.537924	0.202696
	R2-3b1	1	35.42	1.09094	0.085008	1.07677	0.368368	0.162932
	R2-3b1	2	34.25	1.0549	0.0822	1.0412	0.3562	0.15755
	R2-3b1	3	36	1.1088	0.0864	1.0944	0.3744	0.1656
	Both	1	35	1.0885	0.0875	1.05	0.35	0.154
	Both	2	36.54	1.13639	0.09135	1.0962	0.3654	0.160776
	Both	3	35.68	1.10965	0.0892	1.0704	0.3568	0.156992

## Sheet: Fig. 7
	Treatments	Rep.	Nutrient in the media at 90 days after inoculation					Treatments	Rep.	Nutrient tranfer factor
			Available P	Available K	Available Ca	Available Mg				P tranfer factor	K tranfer factor	Ca tranfer factor	Mg tranfer factor
			mg /kg
	Control	1	251.25	537.14	1433.58	305.65		Control	1	0.288	1.70637	0.212416	0.434026
	Control	2	254.25	534.25	1436.25	301.25		Control	2	0.278844	1.68089	0.207731	0.431456
	Control	3	251.26	536.25	1436.85	312.15		Control	3	0.282353	1.67576	0.207785	0.416671
	S2-4a1	1	232.52	489	1405.9	284.36		S2-4a1	1	0.444155	2.53436	0.375453	0.699465
	S2-4a1	2	231.25	487.25	1412.25	285.35		S2-4a1	2	0.474383	2.70172	0.397022	0.74041
	S2-4a1	3	234.25	485.36	1404.25	286.325		S2-4a1	3	0.449289	2.60209	0.383069	0.707923
	R2-3b1	1	248.25	458.65	1452.35	284.36		R2-3b1	1	0.342429	2.34769	0.253636	0.572978
	R2-3b1	2	245.36	468.25	1452.41	286.35		R2-3b1	2	0.335018	2.2236	0.245248	0.550201
	R2-3b1	3	247.25	459.36	1442.36	284.26		R2-3b1	3	0.349444	2.38245	0.259575	0.582565
	Both	1	226.35	480.56	1363.56	276.35		Both	1	0.386569	2.18495	0.256681	0.557264
	Both	2	225.34	480.14	1345.36	277.25		Both	2	0.405387	2.28308	0.2716	0.579895
	Both	3	228.25	480.51	1395.32	278.32		Both	3	0.3908	2.22763	0.255712	0.56407
